# Supplementary material for: Polyglyoxylamide hydrogels for the traceless stimulus-mediated release of covalently-immobilized drugs
Source: Royal Society of Chemistry journal article supplement (doi:10.1039/d4py01214c), 2025-01-01
Supplement: d4py01214c1.pdf [file d4py01214c1.pdf]

**Electronic supporting information for:**

**Polyglyoxylamide hydrogels for the traceless stimulus-mediated release of covalently-immobilized drugs**

Jue Gong,<sup>†</sup> Burak Tavsanli,<sup>†</sup> and Elizabeth R. Gillies<sup>\*†‡</sup>

<sup>†</sup>Department of Chemistry, The University of Western Ontario, 1151 Richmond St., London, Ontario, Canada, N6A 5B7

<sup>‡</sup>Department of Chemical and Biochemical Engineering, The University of Western Ontario, 1151 Richmond St., London, Ontario, Canada, N6A 5B9

**Table of contents**

|                                                                    |     |
|--------------------------------------------------------------------|-----|
| 1. Additional experimental procedures.....                         | S2  |
| 2. Hydrogel formulation details.....                               | S3  |
| 3. <sup>1</sup> H NMR spectra.....                                 | S4  |
| 4. <sup>13</sup> C NMR spectra.....                                | S13 |
| 5. IR spectra.....                                                 | S16 |
| 6. SEC traces.....                                                 | S20 |
| 7. Photos of hydrogels.....                                        | S20 |
| 8. Stress-strain curves.....                                       | S21 |
| 9. Calibration curve for Phe methyl ester using fluorescamine..... | S21 |

**Synthesis of TEG-N<sub>3</sub>-30-PGAm.** This polymer was synthesized by the same procedure as TEG-N<sub>3</sub>-40-PGAm. It was prepared from: PEtG (200 mg, 2.0 mmol of pendent ester, 1.0 equiv.), 2-azidoethylamine (95 mg 1.1 mmol, 0.56 equiv.), dry 1,4-dioxane (5 mL) and TEG-amine (1120 mg, 5.9 mmol, 5.0 equiv.). A tacky solid was obtained. Yield: 92%. <sup>1</sup>H NMR (CDCl<sub>3</sub>, 400 MHz): δ 8.66 – 7.73 (br s, 0.9H), 5.71 (br s, 1.0H), 3.76 – 3.50 (m, 9.4H), 3.43 (s, 1.4H), 3.37 (s, 2.4H). <sup>13</sup>C{<sup>1</sup>H} NMR (CDCl<sub>3</sub>, 400 MHz): δ 167.2, 96.6, 71.9, 70.5, 69.1, 58.9, 39.3. FT-IR: 3516-3148, 2870, 2099, 1674, 1545 cm<sup>-1</sup>. SEC (DMF, PMMA): *M<sub>n</sub>* = 56 kg/mol, *M<sub>w</sub>* = 90 kg/mol, *D* = 1.61.

**Synthesis of *o*NB-TEG-N<sub>3</sub>-20-PGAm.** The synthetic procedure was same as ***o*NB-TEG-N<sub>3</sub>-30-PGAm**. The copolymer was prepared from: **TEG-N<sub>3</sub>-30-PGAm** (100 mg, 0.15 mmol of azide, 1.0 equiv.), alkyne-functionalized *o*-nitrobenzyl alcohol (11.9 mg, 0.051 mmol, 0.33 equiv.), sodium ascorbate (10.1 mg, 0.051 mmol, 0.33 equiv.) and copper sulfate (8.14 mg, 0.051 mmol, 0.33 equiv.) A yellow tacky solid was obtained. Yield: 89%. <sup>1</sup>H NMR (DMSO-*d*<sub>6</sub>, 400 MHz): δ 8.60 – 7.79 (m, 1.5H), 5.56 (br s, 1.0H), 4.89 (br s, 0.2H), 4.47 (br s, 0.4H), 3.82-3.38 (m, 8.7H), 3.24 (s, 2.2H). FT-IR: 3533-3115, 2902, 2101, 1624, 1524 cm<sup>-1</sup>.

**Synthesis of Phe-*o*NB-TEG-N<sub>3</sub>-20-PGAm.** The conjugation of Phe methyl ester to the 20% azide-functionalized copolymer followed the same procedure as for the preparation of **Phe-*o*NB-TEG-N<sub>3</sub>-30-PGAm** except that *o*NB-TEG-N<sub>3</sub>-20-PGAm (115 mg, 0.052 mmol of *o*NB linker, 1.0 equiv.), CDI (84 mg, 0.52 mmol, 10 equiv.) and Phe methyl ester (26 mg, 0.14 mmol, 3.0 equiv.) were used. Yield: 49% <sup>1</sup>H NMR (DMSO-*d*<sub>6</sub>, 400 MHz): δ 8.84 – 7.87 (m, 1.7H), 7.46 – 7.02 (m, 0.5H), 5.56 (br s, 1H), 4.88 (br s, 0.2H), 4.63 – 4.25 (m, 0.4H), 3.87 – 2.87 (m, 15H).

**Table S1.** The formulations of hydrogels containing 4-arm-PEG-alkyne and phenylalanine conjugated PGAm copolymer in 300  $\mu$ L DMF/water (v/v = 4/1).

| <b>15% w/v Hydrogels</b> |                         |                                              |                         |                         |
|--------------------------|-------------------------|----------------------------------------------|-------------------------|-------------------------|
|                          | <b>4-arm-PEG-alkyne</b> | <b>Phe-<i>o</i>NB-TEG-N<sub>3</sub>-PGAm</b> | <b>CuSO<sub>4</sub></b> | <b>Sodium ascorbate</b> |
| Mass (mg)                |                         |                                              |                         |                         |
| 20% azide                | 23                      | 22                                           | 2.7                     | 3.3                     |
| 30% azide                | 27                      | 17                                           | 3.5                     | 4.3                     |

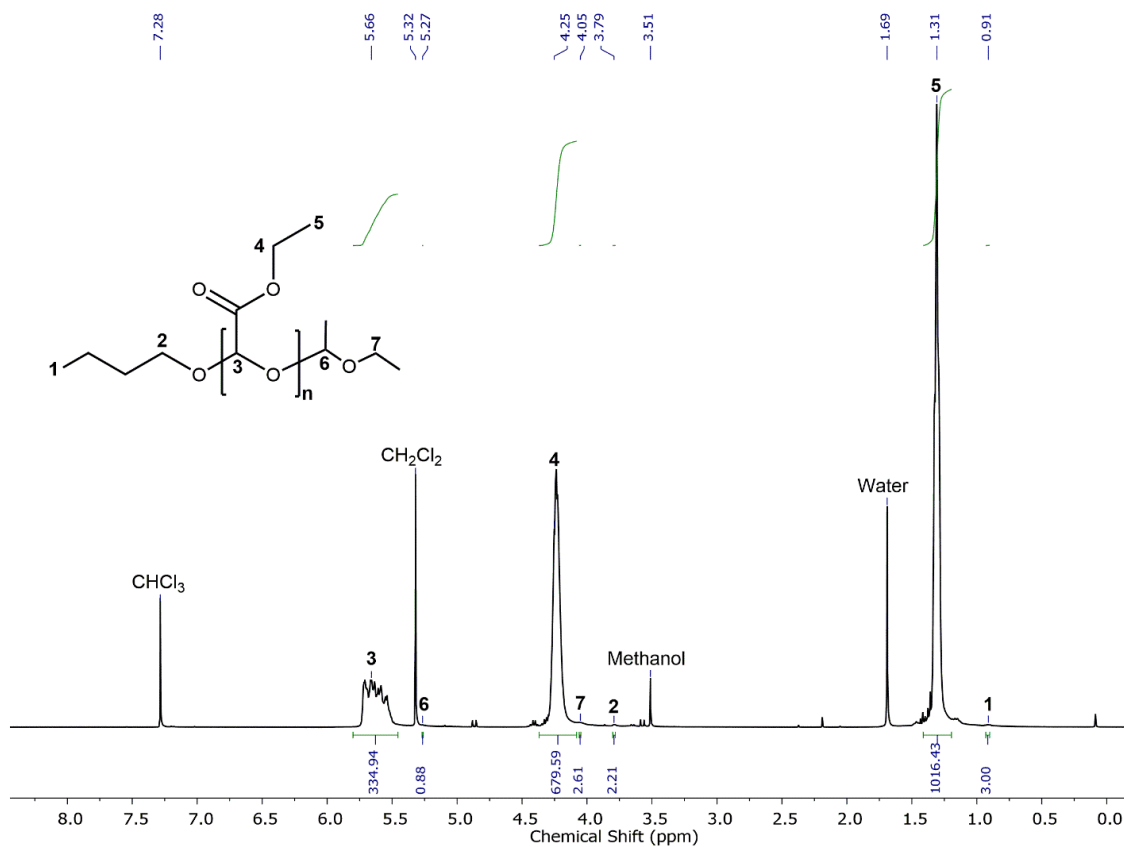

**Figure S1.**  $^1\text{H}$  NMR spectrum of 30 kg/mol **PETg** (CDCl<sub>3</sub>, 400 MHz). A DP<sub>n</sub> of ~335 was determined based on the relative integrals of the methyl CH<sub>3</sub> peak at 0.9 ppm compared to the backbone methine peak at 5.6 ppm.

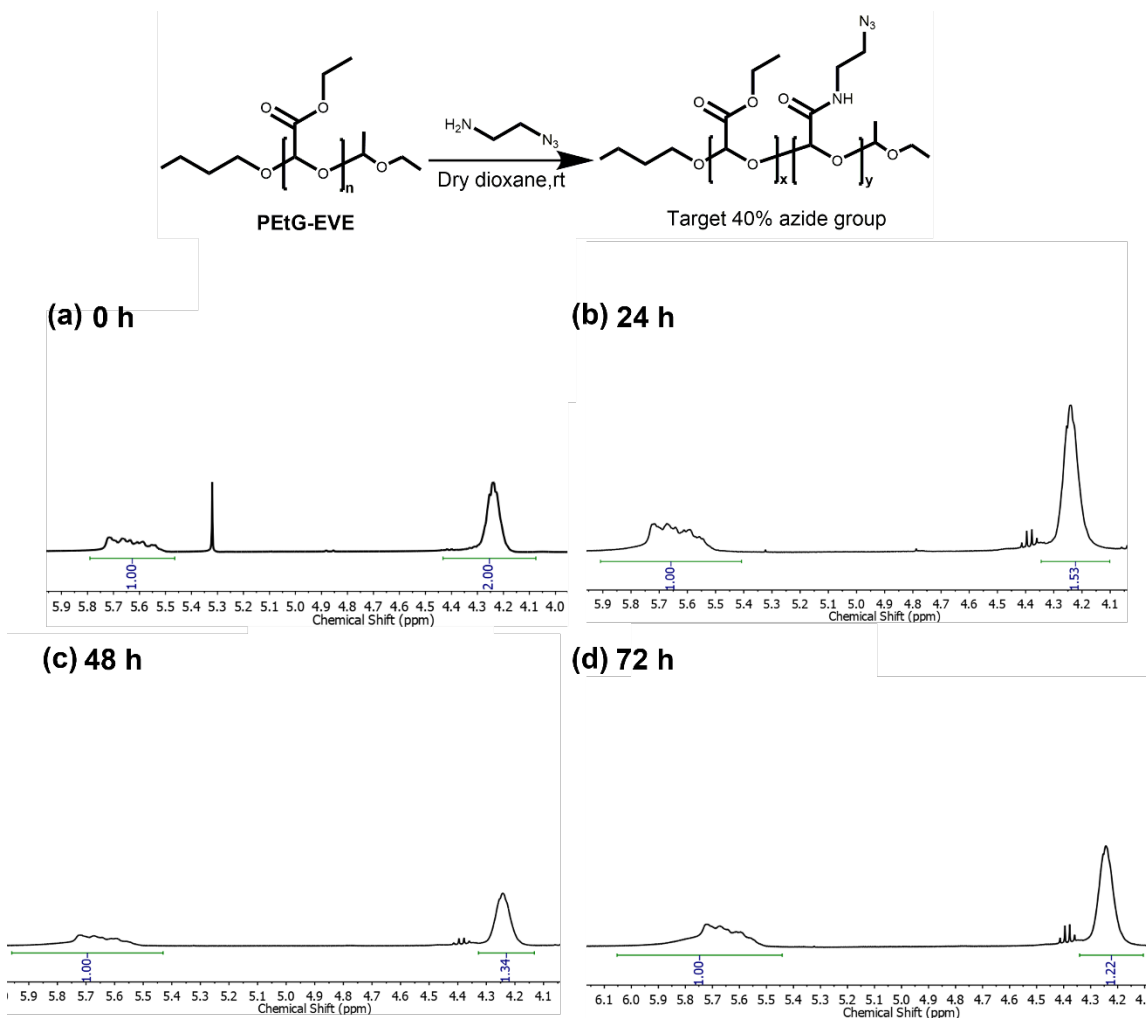

**Figure S2.** Conversion of 40% of the pendent esters of **PEtG** to pendent 2-azidoethylamides in the synthesis of **TEG-N<sub>3</sub>-40-PGAm**. The reaction was monitored by <sup>1</sup>H NMR spectroscopy. The percent functionalization was determined by comparing the integral of the -CH (methine) peak from the polymer backbone at 5.66 ppm with that of the -CH<sub>2</sub> peak from the pendent ester groups at 4.25 ppm. The reaction was stopped when the integral of -CH<sub>2</sub> peak at 4.25 ppm was ~1.20, indicating ~40% azide functionalization was achieved.

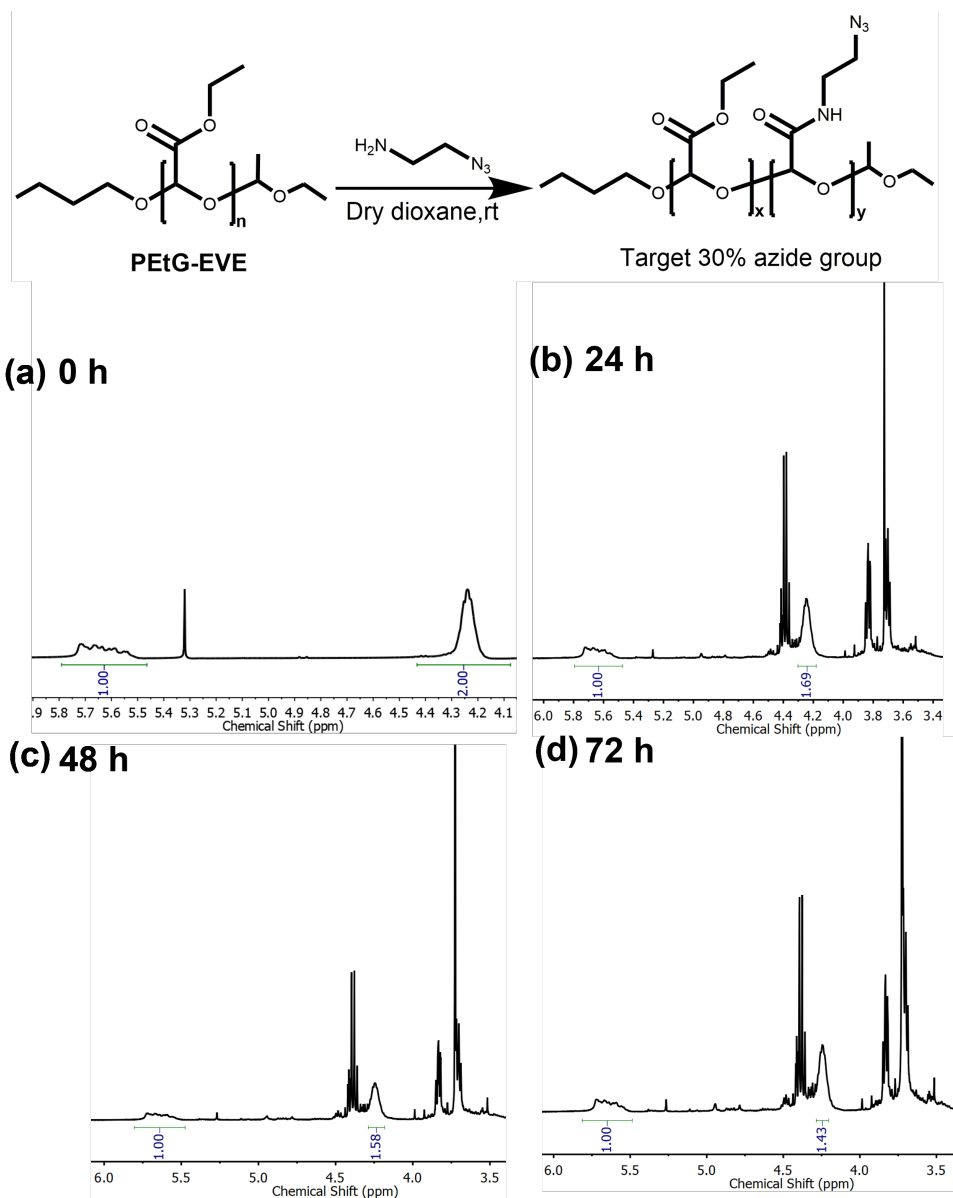

**Figure S3.** Conversion of 30% of the pendent esters of **PEtG** to pendent 2-azidoethylamides in the synthesis of **TEG-N<sub>3</sub>-30-PGAm**. The reaction was monitored by  $^1\text{H}$  NMR spectroscopy. The percent functionalization was determined by comparing the integral of the -CH (methine) peak from the polymer backbone at 5.66 ppm with that of the -CH<sub>2</sub> peak from the pendent ester groups at 4.25 ppm. The reaction was stopped when the integral of -CH<sub>2</sub> peak at 4.25 ppm was  $\sim 1.40$ , indicating  $\sim 30\%$  azide functionalization was achieved.

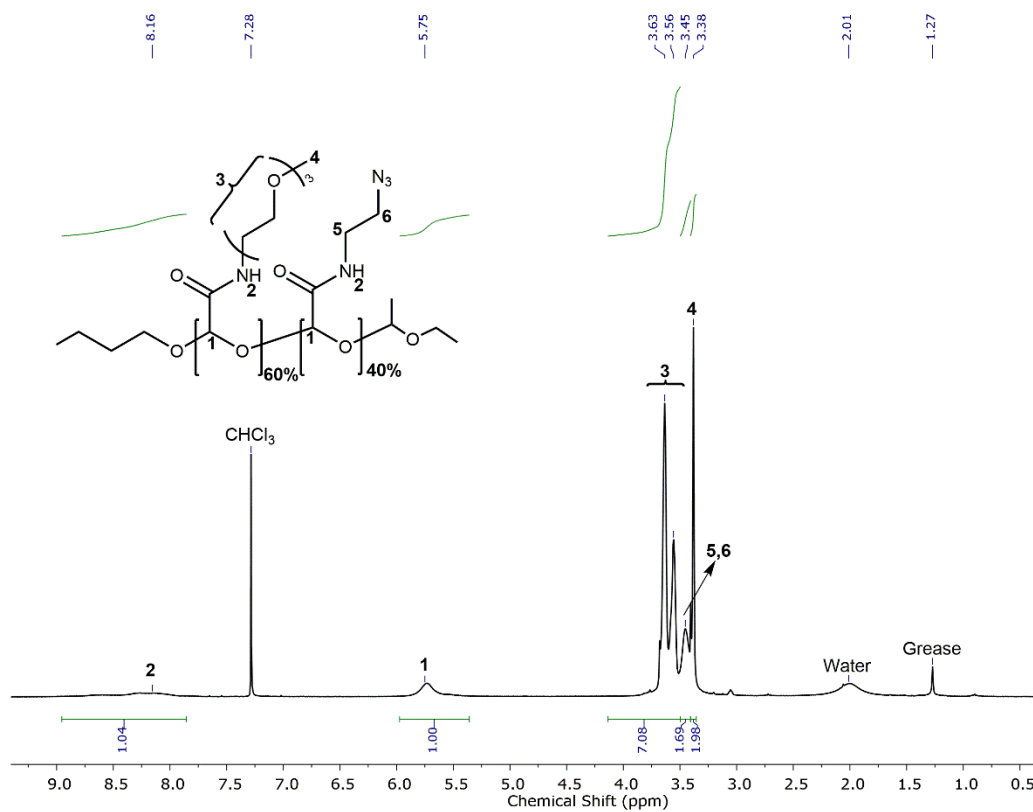

**Figure S4.**  $^1\text{H}$  NMR spectrum of TEG- $\text{N}_3$ -40-PGAm ( $\text{CDCl}_3$ , 400 MHz).

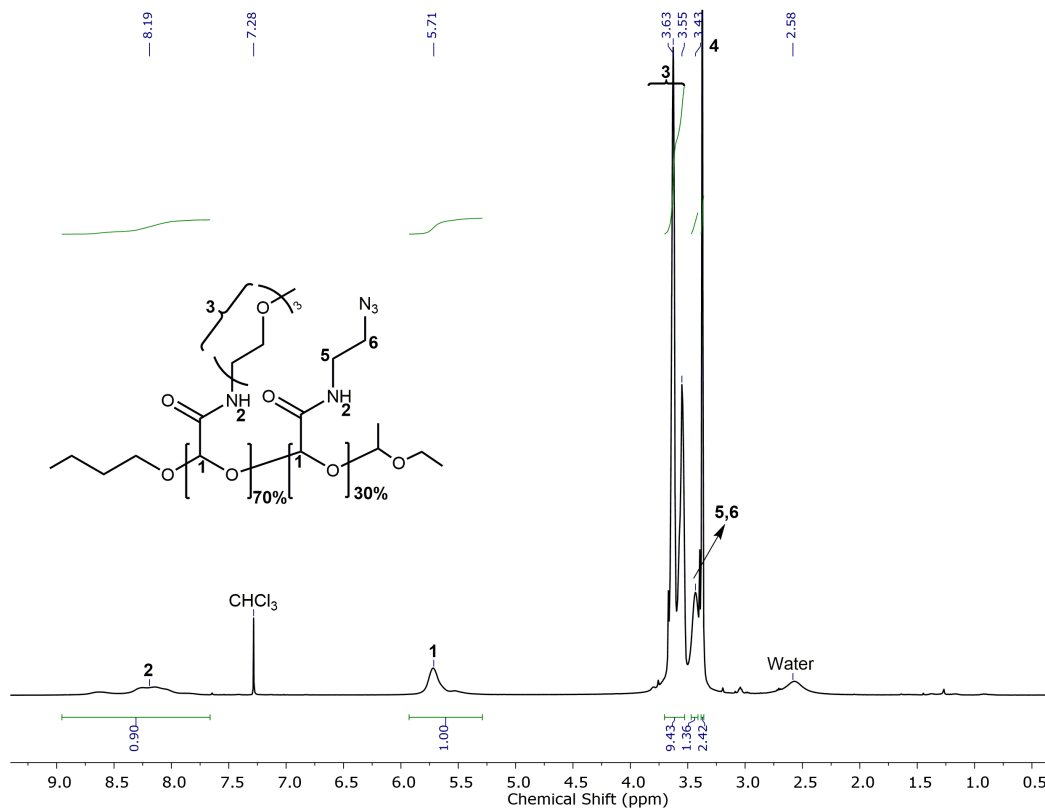

**Figure S5.**  $^1\text{H}$  NMR spectrum of TEG- $\text{N}_3$ -30-PGAm ( $\text{CDCl}_3$ , 400 MHz).



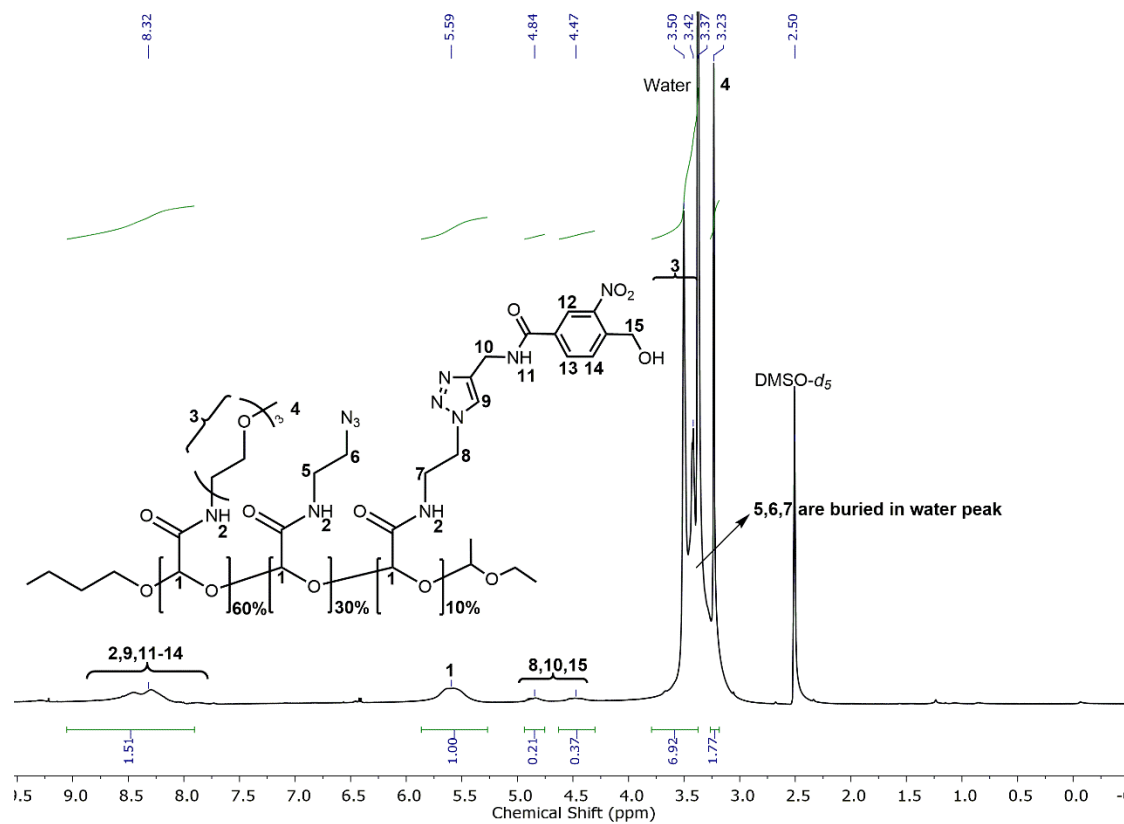

**Figure S6.** <sup>1</sup>H NMR spectrum of *o*NB-TEG-N<sub>3</sub>-30-PGAm (DMSO-*d*<sub>6</sub>, 400 MHz).

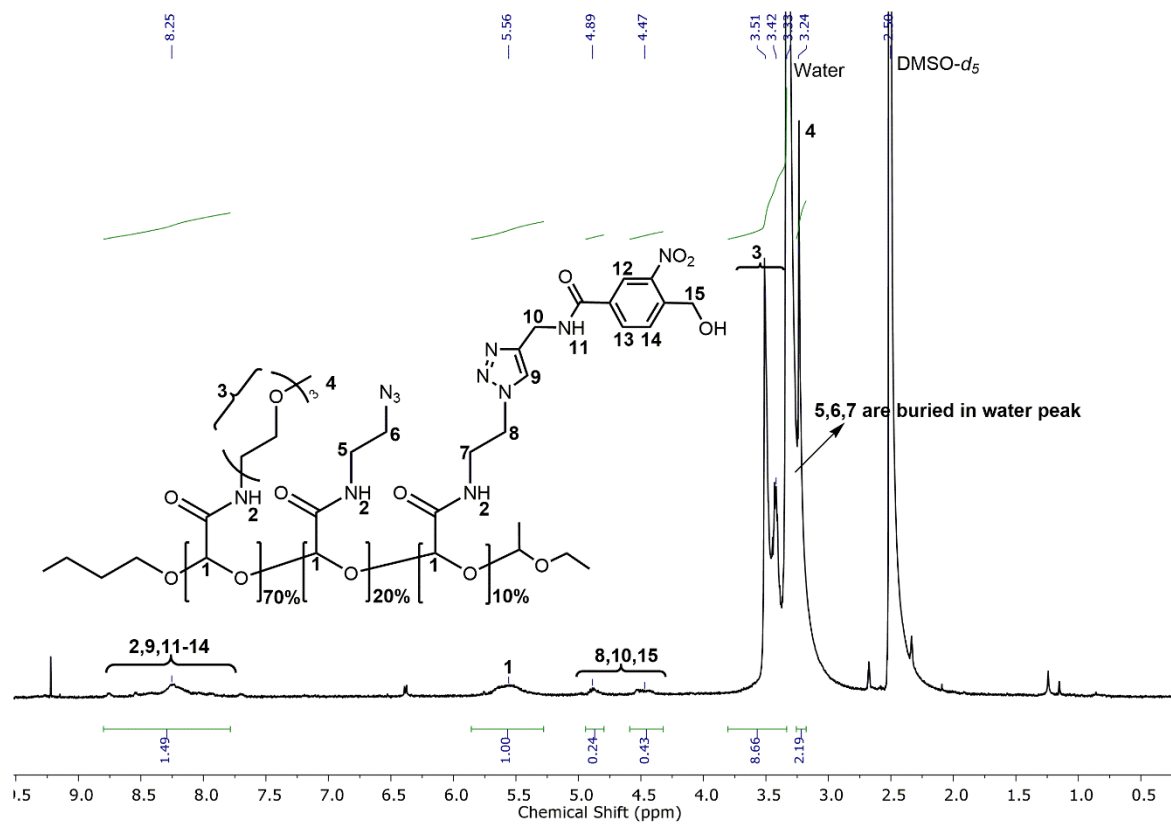

Figure S7. <sup>1</sup>H NMR spectrum of *o*NB-TEG-N<sub>3</sub>-20-PGAm (DMSO-*d*<sub>6</sub>, 400 MHz).

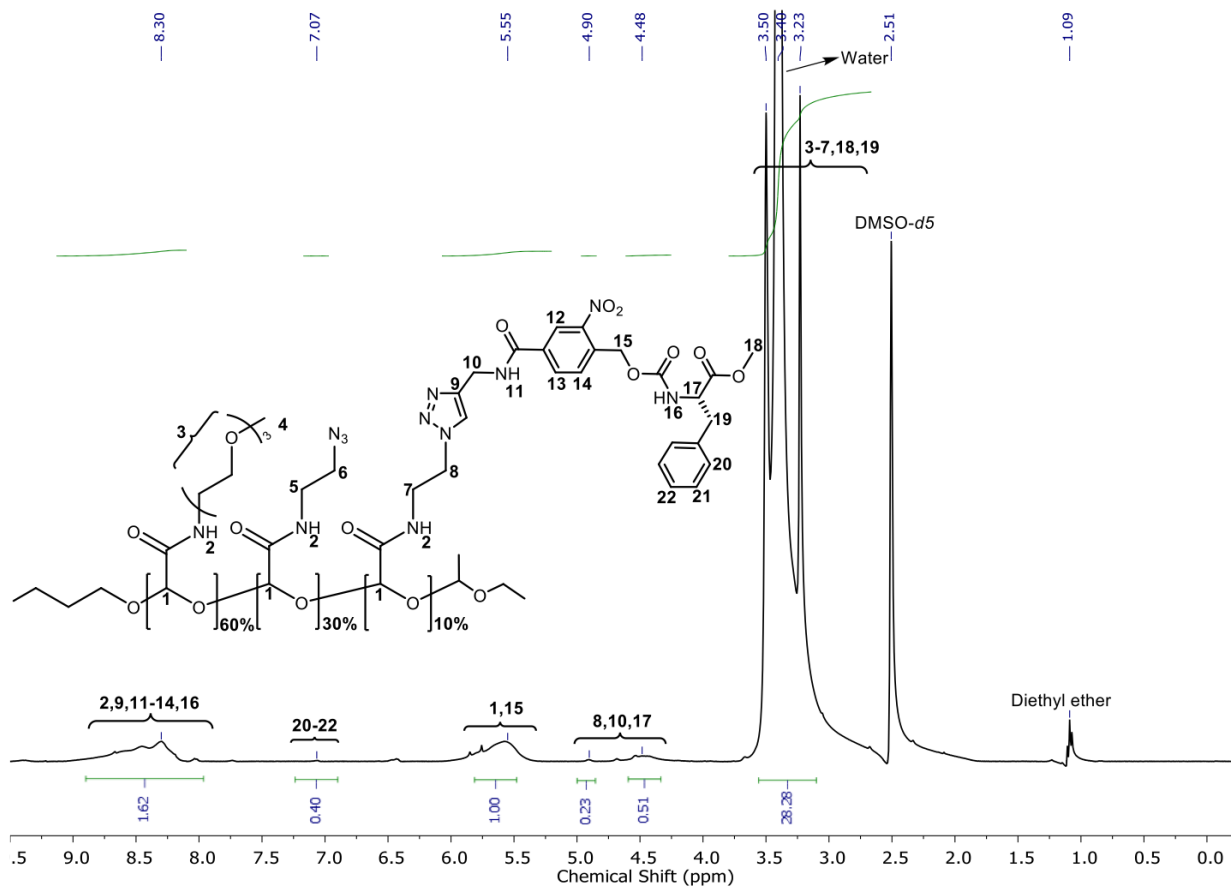

**Figure S8.** <sup>1</sup>H NMR spectrum of **Phe-*o*NB-TEG-N<sub>3</sub>-30-PGAm** (DMSO-*d*<sub>6</sub>, 400 MHz).

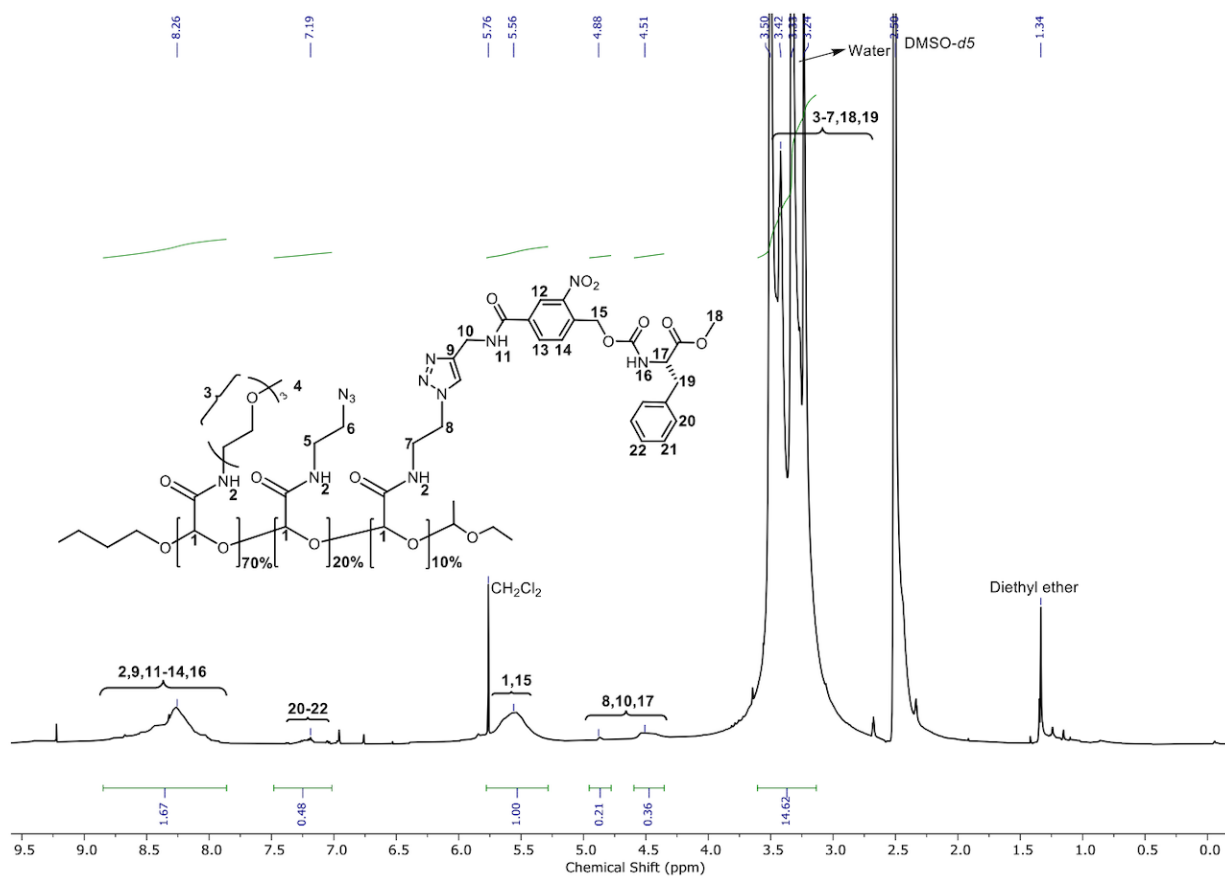

**Figure S9.** <sup>1</sup>H NMR spectrum of **Phe-*ortho*NB-TEG-N<sub>3</sub>-20-PGAm** (DMSO-*d*<sub>6</sub>, 400 MHz).

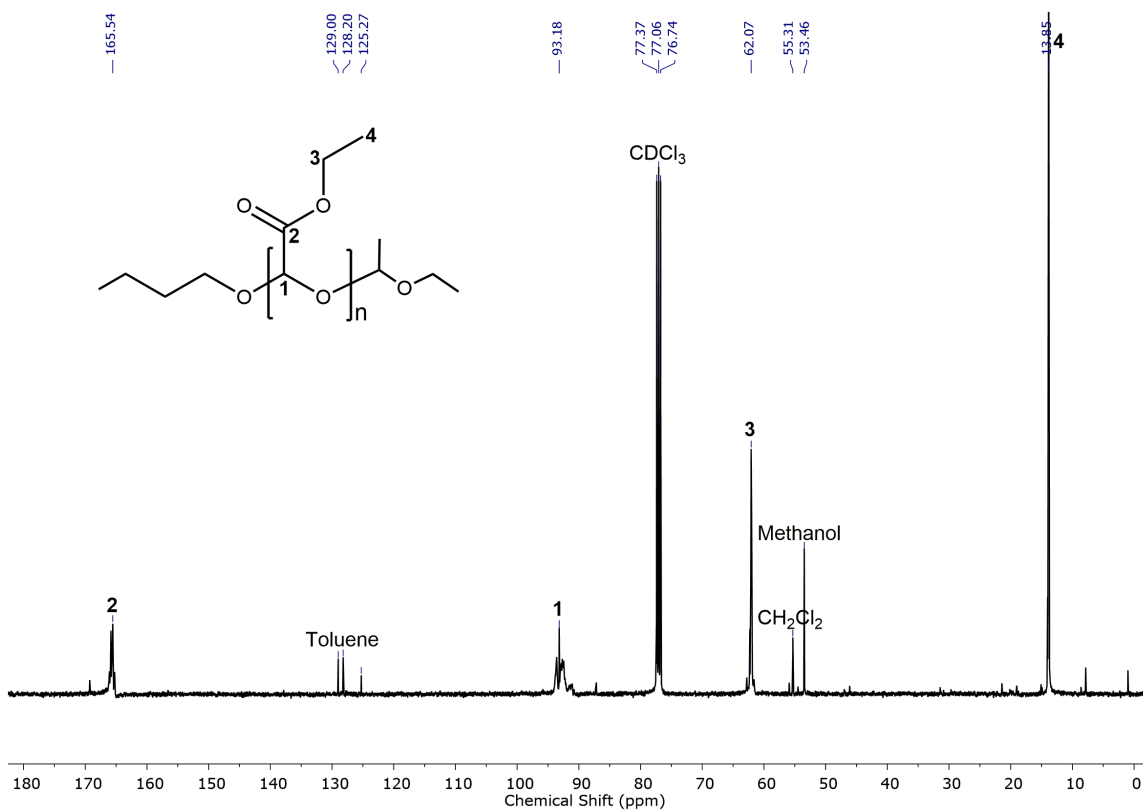

**Figure S10.**  $^{13}\text{C}\{^1\text{H}\}$  NMR spectrum of PETg (CDCl<sub>3</sub>, 100 MHz). Note that end-cap peaks are not observed in the spectrum due to the high molar mass.

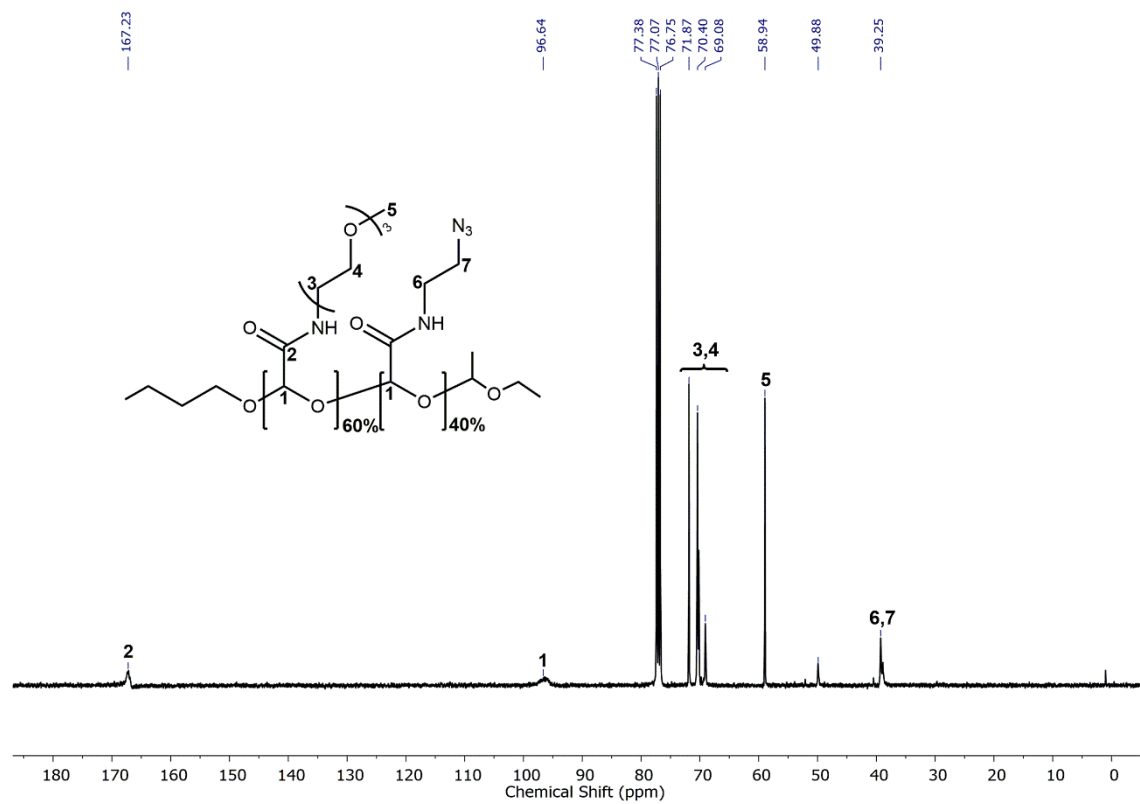

**Figure S11.**  $^{13}\text{C}\{^1\text{H}\}$  NMR spectrum of TEG-N<sub>3</sub>-40-PGAm (CDCl<sub>3</sub>, 100 MHz).

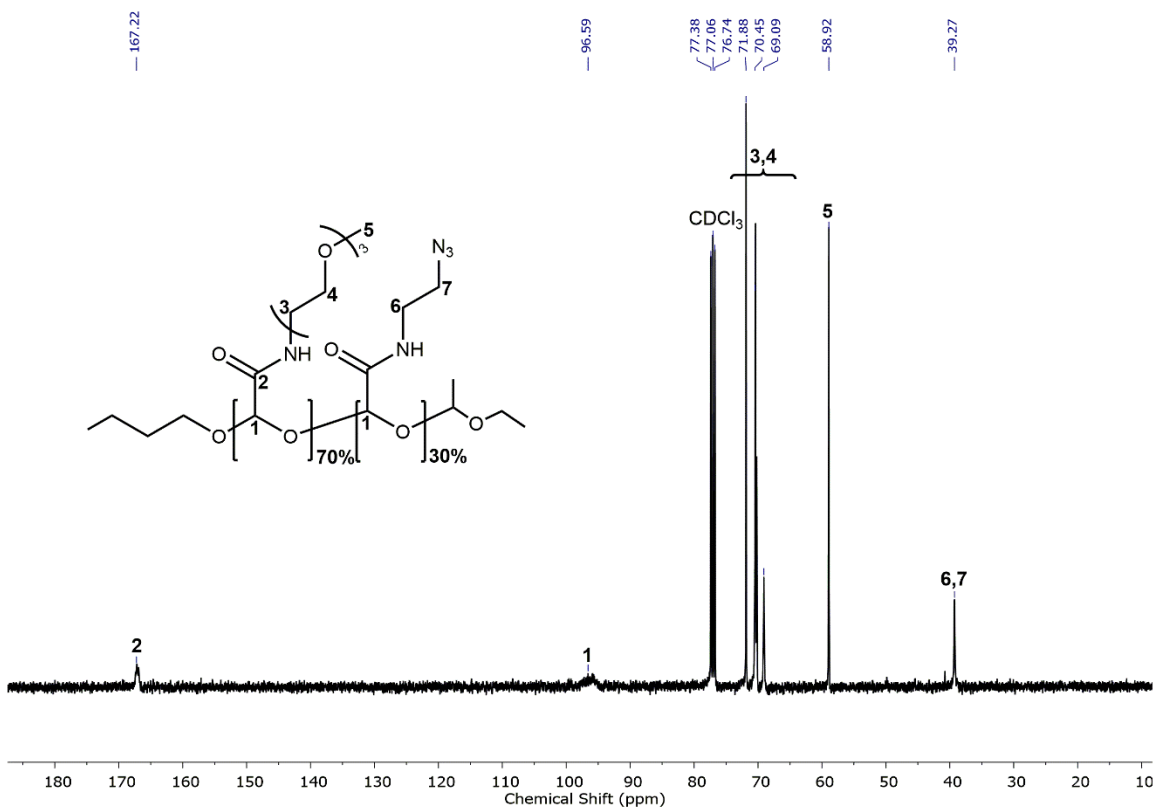

**Figure S12.** <sup>13</sup>C{<sup>1</sup>H} NMR spectrum of TEG-N<sub>3</sub>-30-PGAm (CDCl<sub>3</sub>, 100 MHz).

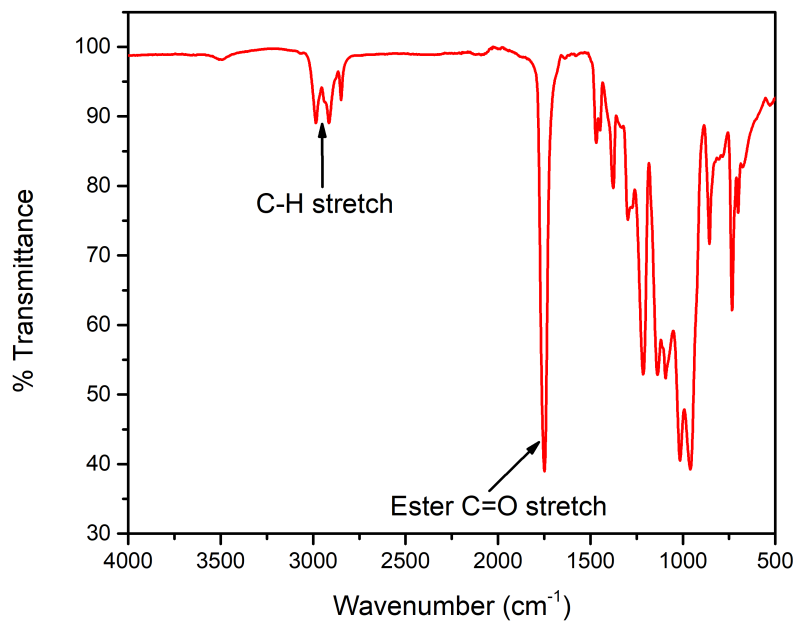

**Figure S13.** FT-IR spectrum of **PETg**.

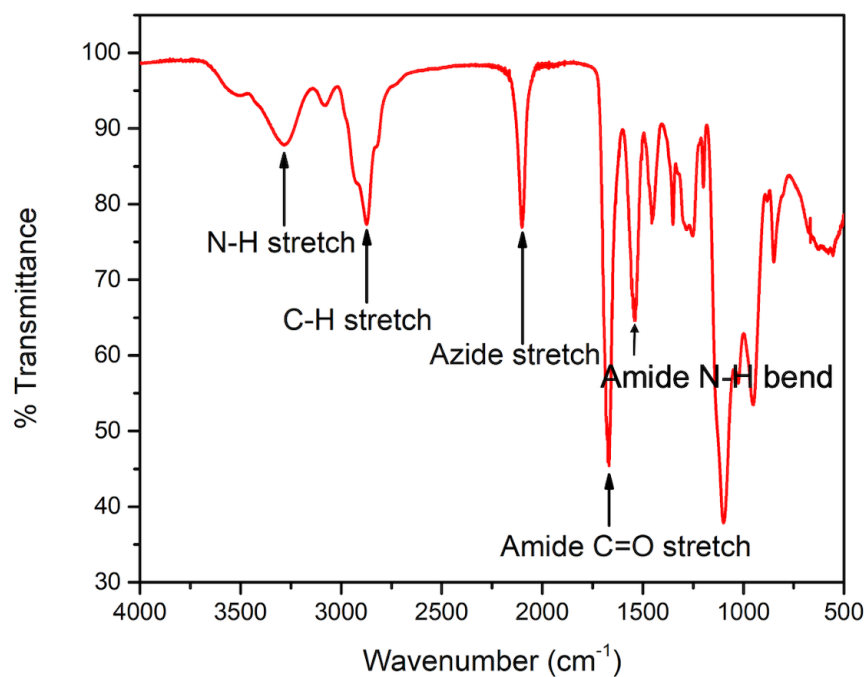

**Figure S14.** FT-IR spectrum of **TEG-N<sub>3</sub>-40-PGAm**.



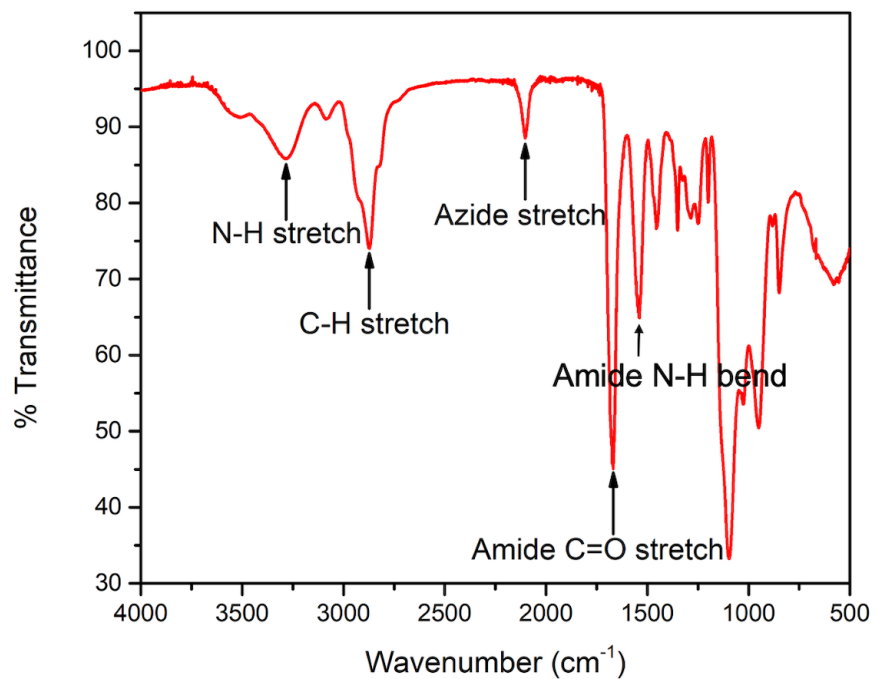

**Figure S15.** FT-IR spectrum of TEG-N<sub>3</sub>-30-PGAm.

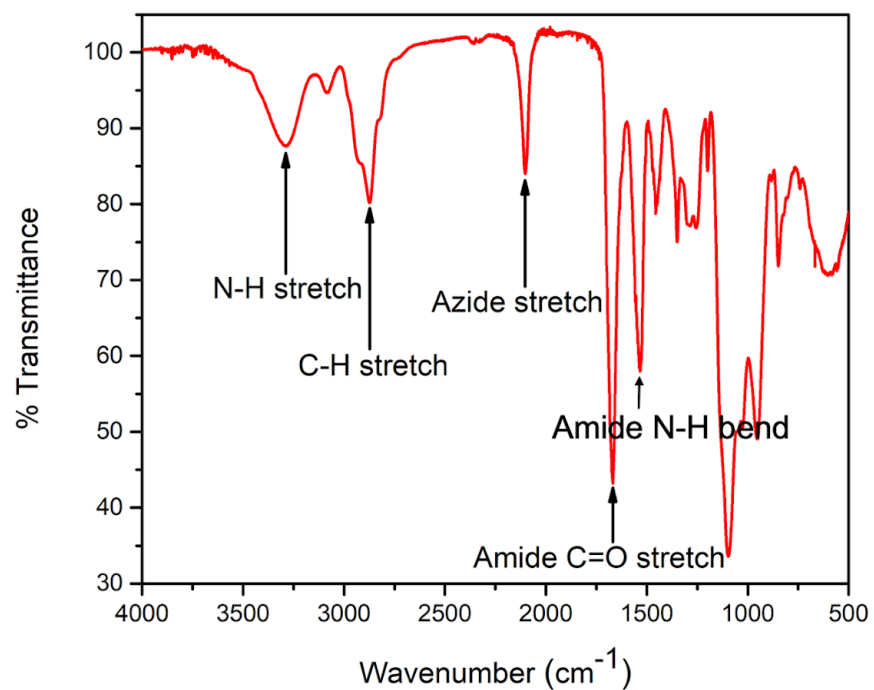

**Figure S16.** FT-IR spectrum of *o*NB-TEG-N<sub>3</sub>-30-PGAm.

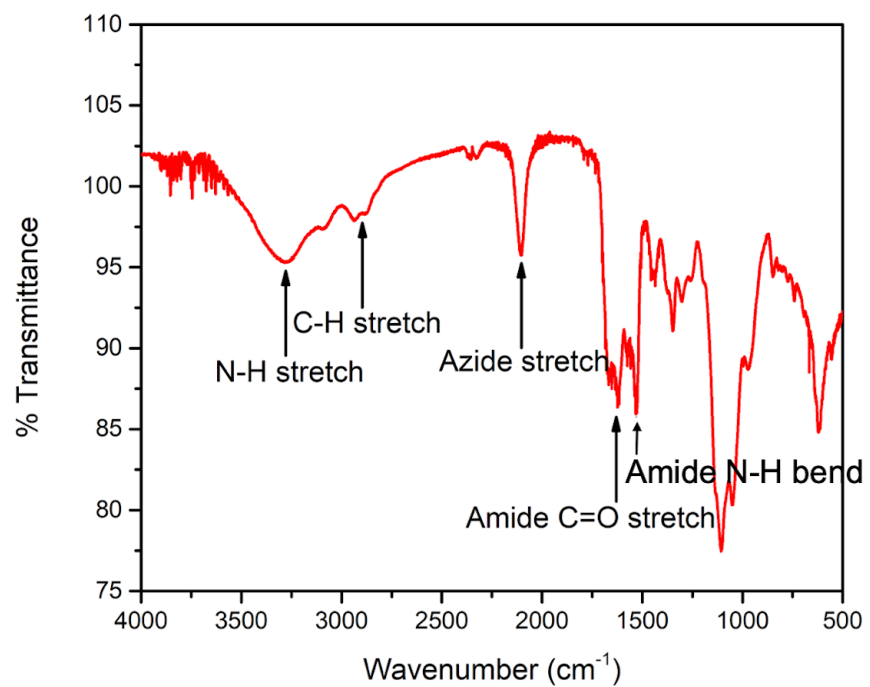

**Figure S17.** FT-IR spectrum of *o*NB-TEG-N<sub>3</sub>-20-PGAm.

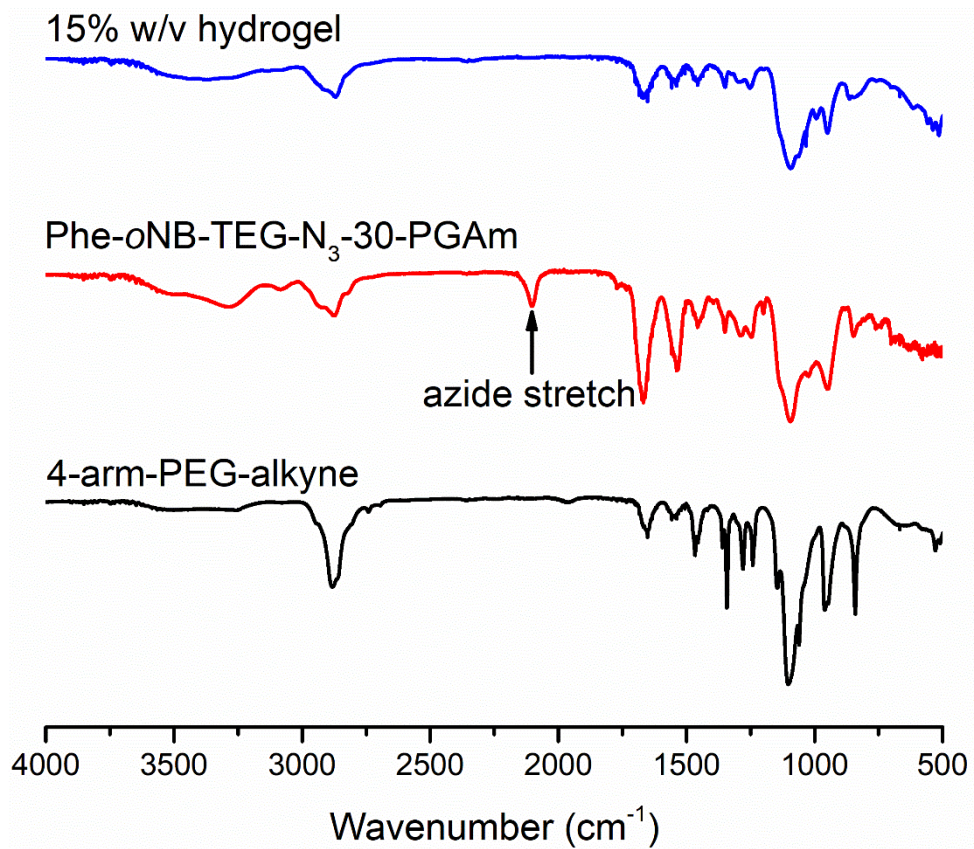

**Figure S18.** Overlay of the FT-IR spectra of **4-arm-PEG-alkyne**, **Phe-*o*NB-TEG-N<sub>3</sub>-30-PGAm** and the corresponding **hydrogel**.

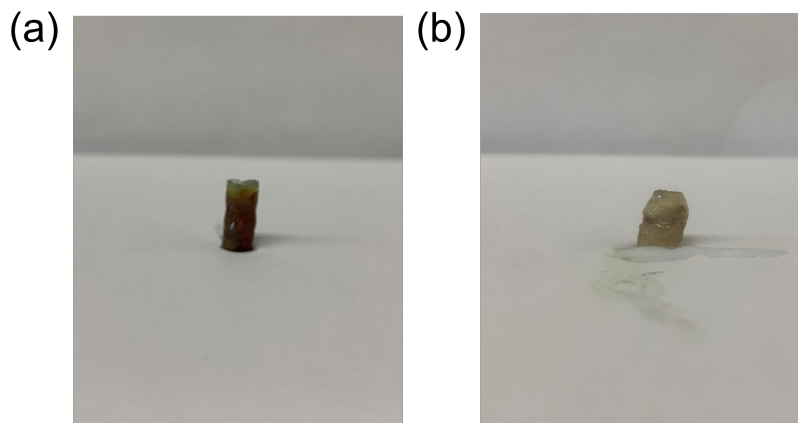

**Figure S19.** Photos of the 15% w/v **Phe-*o*NB-TEG-N<sub>3</sub>-30-PGAm** hydrogel a) immediately after gelation and b) after removal of copper and the DMF.

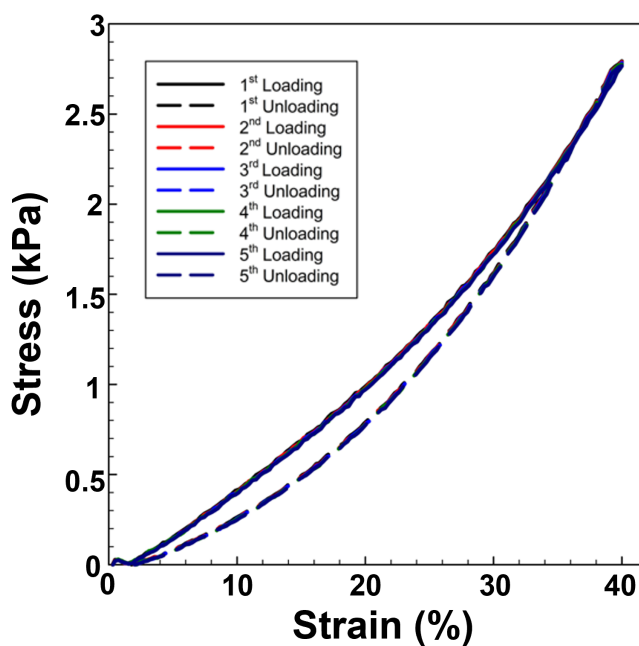

**Figure S20.** Cyclic loading (compression) and unloading (relaxation) stress-strain curves of a representative **Phe-*o*NB-TEG-N<sub>3</sub>-30-PGAm** 15% w/v hydrogel, measured in PBS.

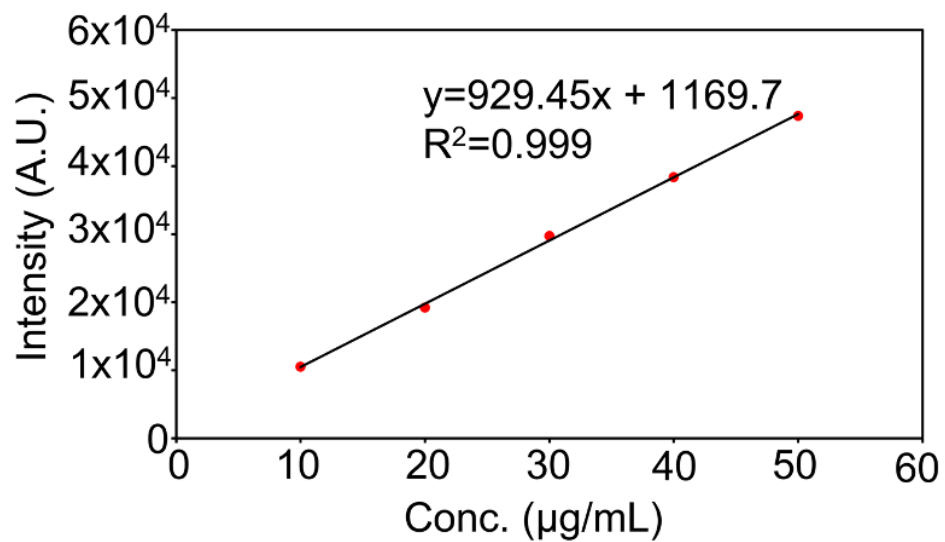

**Figure S21.** The calibration curve for the fluorescamine assay for Phe methyl ester showing the intensity of fluorescence at 470 nm versus Phe methyl ester concentration.
